# Supplementary material for: Delving into theoretical and computational considerations for accurate calculation of chemical shifts in paramagnetic transition metal systems using quantum chemical methods
Source: Royal Society of Chemistry journal article supplement (doi:10.1039/d4cp00683f), 2024-01-01
Supplement: d4cp00683f1.pdf [file d4cp00683f1.pdf]

# Supporting information: Delving into Theoretical and Computational Considerations for Accurate Calculation of Chemical Shifts in Paramagnetic Transition Metal Systems using quantum chemical methods

Md. Ashraful Islam\*, and Andrew J. Pell\*

*CRMN Lyon, ENS de Lyon*

E-mail: ashraful.islam@ens-lyon.fr, andrew.pell@ens-lyon.fr

**The metal-nuclear hyperfine tensor** In the non-relativistic theory with spin-orbit coupling (SOC) described as perturbation, the hyperfine coupling can be separated into the anisotropic dipolar and isotropic Fermi contact contributions. These two contributions to the hyperfine coupling are calculated using the following equations,

$$A_{Kij}^{dip} = \frac{\mu_0 \mu_B}{4\pi} \gamma_K \hbar g_e \left[ \sum \rho_{pq}^{\alpha-\beta} \langle \phi_p | \hat{T}_{Kij} | \phi_q \rangle - \frac{1}{N} \sum_{kl} \frac{\partial \rho_{pq}^{\alpha-\beta}}{\partial I_{Ki}} \langle \phi_p | \hat{h}_j^{SOC} | \phi_q \rangle \right] \quad (S1)$$

$$A_K^{FC} = \frac{2}{3} \mu_0 \mu_B g_e \gamma_K \hbar \langle S_z \rangle^{-1} \sum \rho_{pq}^{\alpha-\beta} \delta(\mathbf{r} - \mathbf{r}_K) \quad (S2)$$

where  $g_e$  is the free-electron  $g$ -factor,  $\mu_0$  is the magnetic permeability,  $\mu_B$  is the Bohr magneton,  $\rho^{\alpha-\beta}$  is the spin density matrix in the molecular orbital basis  $\{\phi\}$ ,  $I_K$  and  $\gamma_K$  are the spin quantum number and gyromagnetic ratio of nucleus  $K$ , respectively.  $\hat{h}_j^{SOC}$  is the effective one-electron SOC Hamiltonian which includes the effect of SOC in the hyperfine

tensors, and  $\hat{T}_{Kij} = r^{-5} (3\hat{r}_{Ki}\hat{r}_{Kj} - r_K^2\delta_{ij})$  where  $\mathbf{r}_K$  is the distance from metal to nucleus  $K$ . Eq. S1 is solved through coupled perturbed SCF iterative technique with respect to the nucleus-electron orbit coupling as (coupled) perturbation. The first and last terms of eq. S1 separates the spin-dipolar  $A_{Kij}^{SD}$  and orbital  $A_{Kij}^{Orb}$  contributions of the unpaired electrons to the dipolar hyperfine tensor.

It is essential to recognize that the discussion on hyperfine interaction here pertains to a classical non-relativistic standpoint. In both the minimally coupled four-component relativistic Dirac theory and non-relativistic Lévy-Leblond theory for electrons, there is an absence of a term involving a delta function as given in eq. S2. Consequently, the concept of a contact interaction does not arise within these frameworks. Instead, the first-order interaction terms in the two-component theory, which are derived from either the four-component Dirac equation or the Lévy-Leblond equation, naturally give rise to the contact interaction<sup>1</sup>. Moreover, the mathematical forms of hyperfine operators in the two-component methods can vary depending on how the four-component Dirac theory is reduced to the two-component method. The phenomenon known as “picture change effects” associated with the hyperfine interaction is discussed in references such as<sup>2-7</sup> for the two-component approaches like ZORA, DKH, X2C. Relativistic effects are generally minimal in the context of light atoms and thus for the sake of brevity we have discussed focusing on the non-relativistic level of theory.

**The point-dipole approximation of the hyperfine tensor** In the point dipole approximation, the dipolar contributions of the hyperfine tensor reduces to

$$\begin{aligned} A_{Kij}^{dip} &= \frac{\mu_0\mu_B}{4\pi}\gamma_K\hbar\sum_{ijk}g_{ik}T_{kj} \\ &= \frac{\mu_0\mu_B}{4\pi}\gamma_K\hbar g_e\sum_{ij}T_{ij} + \frac{\mu_0\mu_B}{4\pi}\gamma_K\hbar\sum_{ikj}\Delta g_{ik}T_{kj} \end{aligned} \quad (\text{S3})$$

Hence, considering the form of the hyperfine tensor of eq. S3 leads to the evaluation of

the dipolar hyperfine shielding according to eq. 1 in a semi-classical fashion,

$$\sigma_{Kij}^p = -\frac{1}{4\pi N_A} \sum_{ij} \chi_{ik} \cdot T_{kj} \quad (\text{S4})$$

which can be separated into the pure spin-dipolar (SD) and orbital (PSO) contributions,

$$\sigma_{Kij}^{SD} = -\frac{1}{4\pi N_A} \sum_{ij} \chi_{ik}^s \cdot T_{kj} \quad (\text{S5})$$

$$\sigma_{Kij}^{PSO} = -\frac{1}{4\pi N_A} \sum_{ij} \chi_{ik}^s \cdot \Delta g_{kl} \cdot T_{Klj}$$

by considering the shifts of the  $g$ -tensor component from the free electron value,  $g_{ik} = g_e - \Delta g_{ik}$ . Note that, the  $\chi_{ik}$  in eq. S4 is the component of the Van Vleck paramagnetic susceptibility whereas in eq. S5  $\chi_{ik}^s$  is the spin-only component to the Van Vleck paramagnetic susceptibility.

Table S1: SO energy levels (in  $\text{cm}^{-1}$ ) due to the state interactions of the two energetically lowest SF states from CAS based methods. The SO energy levels are doubly degenerate.

| n° | CoTp <sub>2</sub> |           | [Co(AcPyOx) <sub>3</sub> (BPh)] <sup>+</sup> |           |
|----|-------------------|-----------|----------------------------------------------|-----------|
|    | SF-CASSCF         | SF-CASPT2 | SF-CASSCF                                    | SF-CASPT2 |
| 1  | 0                 | 0         | 0                                            | 0         |
| 2  | 34                | 44        | 386                                          | 499       |
| n° | SO-CASSCF         | SO-CASPT2 | SO-CASSCF                                    | SO-CASPT2 |
|    |                   |           |                                              |           |
| 1  | 0                 | 0         | 0                                            | 0         |
| 2  | 276               | 268       | 270                                          | 246       |
| 3  | 554               | 541       | 775                                          | 839       |
| 4  | 830               | 809       | 1046                                         | 1086      |

Table S2: SO energy levels (in  $\text{cm}^{-1}$ ) due to the state interactions of all the quintet and doublet SF states from CAS based methods. The SF energy states of the ground <sup>4</sup>F manifolds are given. The SO energy levels are doubly degenerate.

| n° | CoTp <sub>2</sub> |           | [Co(AcPyOx) <sub>3</sub> (BC <sub>6</sub> H <sub>5</sub> )] <sup>+</sup> |           |
|----|-------------------|-----------|--------------------------------------------------------------------------|-----------|
|    | SF-CASSCF         | SF-CASPT2 | SF-CASSCF                                                                | SF-CASPT2 |
| 1  | 0                 | 0         | 0                                                                        | 0         |
| 2  | 34                | 44        | 386                                                                      | 499       |
| 3  | 1820              | 2316      | 4723                                                                     | 5723      |
| 4  | 8185              | 9586      | 7276                                                                     | 8703      |
| 5  | 8408              | 9710      | 7569                                                                     | 9045      |
| 6  | 8946              | 10005     | 8235                                                                     | 9481      |
| 7  | 17631             | 21974     | 13277                                                                    | 16211     |
| n° | SO-CASSCF         | SO-CASPT2 | SO-CASSCF                                                                | SO-CASPT2 |
|    |                   |           |                                                                          |           |
| 1  | 0                 | 0         | 0                                                                        | 0         |
| 2  | 241               | 232       | 230                                                                      | 209       |
| 3  | 514               | 501       | 729                                                                      | 796       |
| 4  | 843               | 811       | 1030                                                                     | 1069      |
| 5  | 2242              | 2689      | 4934                                                                     | 5896      |
| 6  | 2335              | 2785      | 5035                                                                     | 5991      |
| 7  | 8581              | 9923      | 7548                                                                     | 8930      |

Table S3: SF and SO CAS based energy levels (in  $\text{cm}^{-1}$ ) calculated from ORCA 5.0 to verify the effects of NEVPT2 dynamical correlation correction with the CASPT2 results from Table S2. The SF energy states of the ground  $^4F$  manifolds are given. The SO energy levels are doubly degenerate. The computational details is similar to the hyperfine calculation from CAS space in ORCA as mentioned in the main text except TZVP basis set was utilized for the ligand atoms.

| n | CoTp <sub>2</sub> |           | [Co(AcPyOx) <sub>3</sub> (BC <sub>6</sub> H <sub>5</sub> )] <sup>+</sup> |           |
|---|-------------------|-----------|--------------------------------------------------------------------------|-----------|
|   | SF-CASSCF         | SF-NEVPT2 | SF-CASSCF                                                                | SF-NEVPT2 |
| 1 | 0                 | 0         | 0                                                                        | 0         |
| 2 | 33                | 42        | 380                                                                      | 507       |
| 3 | 1881              | 2431      | 4718                                                                     | 6024      |
| 4 | 8125              | 10658     | 7269                                                                     | 9707      |
| 5 | 8353              | 10969     | 7564                                                                     | 10128     |
| 6 | 8928              | 11780     | 8208                                                                     | 11036     |
| 7 | 17513             | 22475     | 13221                                                                    | 16937     |
| n | SO-CASSCF         |           | SO-NEVPT2                                                                |           |
|   | SO-CASSCF         | SO-NEVPT2 | SO-CASSCF                                                                | SO-NEVPT2 |
| 1 | 0                 | 0         | 0                                                                        | 0         |
| 2 | 235               | 235       | 224                                                                      | 205       |
| 3 | 501               | 504       | 713                                                                      | 797       |
| 4 | 819               | 810       | 1004                                                                     | 1058      |
| 5 | 2288              | 2813      | 4924                                                                     | 6209      |
| 6 | 2376              | 2895      | 5020                                                                     | 6292      |
| 7 | 8510              | 9786      | 7532                                                                     | 9933      |

Table S4: The SO-CAS based EPR spin Hamiltonian parameters of the two lowest KDs modeled with a pseudospin  $\tilde{S} = 3/2$ .

|                                              |                  | $g_{\perp}$ | $g_{\parallel}$ | $D$                | $E$  |
|----------------------------------------------|------------------|-------------|-----------------|--------------------|------|
| CoTp <sub>2</sub>                            | SO-CASSCF        | 1.74,1.79   | 3.27            | -114.7             | 21.1 |
|                                              | SO-CASPT2        | 1.72,1.76   | 3.25            | -112.4             | 15.8 |
|                                              | Exp <sup>a</sup> | 1.9         | 2.1             | -98.5 <sup>a</sup> |      |
| [Co(AcPyOx) <sub>3</sub> (BPh)] <sup>+</sup> | SO-CASSCF        | 1.95,1.98   | 3.25            | -114.8             | 3.2  |
|                                              | SO-CASPT2        | 1.96,2.00   | 3.16            | -104.4             | 2.4  |
|                                              | Exp <sup>b</sup> | 2.08        | 3.09            | -86                |      |
|                                              | <sup>c</sup>     | 2.22        | 2.86            | -95                |      |

<sup>a</sup>:from the fit of THz-EPR spectra<sup>8</sup>, <sup>b</sup>: from the fit of SQUID magnetic susceptibility, <sup>c</sup> : from the fit of  $\Delta\chi_{ax}$  determined from paramagnetic NMR shifts<sup>9</sup>.

Table S5: Experimentally reported chemical shifts (in ppm) in the  $[M(\text{AcPyOx})_3(\text{BPh})]^+$  complexes from Ref.<sup>9</sup>. The paramagnetic chemical shifts (Para) (in ppm) in the paramagnetic Mn(II), Ni(II) and Co(II) complexes are evaluated with respect to the diamagnetic Fe(II) complex.

|         | Fe    | Mn    | Ni     | Co     | Para  |        |        |
|---------|-------|-------|--------|--------|-------|--------|--------|
|         |       |       |        |        | Mn    | Ni     | Co     |
| o-PhC   | 131.7 | 145.4 | 147.7  | 208.6  | 13.7  | 16.0   | 76.9   |
| m-PhC   | 127.4 | 131.3 | 130.0  | 164.7  | 3.9   | 2.6    | 37.3   |
| p-PhC   | 128.0 | 127.9 | 128.0  | 155.4  | -0.1  | 0.0    | 27.4   |
| i-PhC   | -     | -     | 78.4   | -      | -     | -      | -      |
| o'-PyC  | 153.0 | -     | -9.6   | 263.9  | -     | -162.6 | 110.9  |
| m'-PyC  | 125.8 | 635.9 | 544.2  | 554.9  | 510.1 | 418.4  | 429.1  |
| p-PyC   | 137.9 | 391.6 | 116.3  | 146.7  | 253.7 | -21.6  | 8.8    |
| m''-PyC | 124.5 | 188.2 | 393.1  | 318.3  | 63.7  | 268.6  | 193.8  |
| o''-PyC | 158.0 | -     | -116.9 | -476.5 | -     | -274.9 | -634.5 |
| *C=N    | 160.6 | 807.0 | 54.0   | 97.7   | 646.4 | -106.6 | -62.9  |
| *CH3    | 13.2  | 11.7  | 322.0  | 189.4  | -1.5  | 308.8  | 176.2  |
| o-PhH   | 7.8   | 8.5   | 7.4    | 67.9   | 0.7   | -0.4   | 60.1   |
| m-PhH   | 7.4   | 7.3   | 6.6    | 29.9   | -0.1  | -0.8   | 22.5   |
| p-PhH   | 7.4   | 7.5   | 6.9    | 25.7   | 0.1   | -0.5   | 18.3   |
| o'-PyH  | 7.1   | 104   | 137.3  | 396.2  | 96.9  | 130.2  | 389.1  |
| m'-PyH  | 7.5   | 47.0  | 44.1   | 80.1   | 39.5  | 36.6   | 72.6   |
| p-PyH   | 8.1   | -25.9 | 15.5   | 15.1   | -34.0 | 7.4    | 7.0    |
| m''-PyH | 7.9   | 47.0  | 59.9   | -2.5   | 39.1  | 52.0   | -10.4  |
| CH3*    | 2.7   | -     | -24.0  | 2.4    | -     | -26.7  | -0.3   |

Table S6: The SD and PSO contributions (in ppm) of the dipolar hyperfine tensors to the dipolar chemical shifts (Dip) in the  $[\text{Ni}(\text{AcPyOx})_3(\text{BPh})]^+$  complex. The dipolar hyperfine tensors are evaluated according to the two QC methods, namely the unrestricted DFT ZORA-PBE0 and SO-CASSCF, for comparison.

|         | ZORA-PBE0 |      |      | SO-CASSCF |      |      |
|---------|-----------|------|------|-----------|------|------|
|         | SD        | PSO  | Dip  | SD        | PSO  | Dip  |
| o-PhC   | -1.0      | 0.0  | -1.0 | -0.9      | -1.0 | -1.9 |
| m-PhC   | -0.5      | -0.1 | -0.6 | -0.5      | -0.5 | -1.0 |
| p-PhC   | -0.4      | -0.1 | -0.5 | -0.4      | -0.4 | -0.8 |
| i-PhC   | -1.6      | 0.2  | -1.4 | -1.6      | -1.5 | -3.1 |
| o'-PyC  | -3.1      | 7.8  | 4.7  | -2.1      | 1.0  | -1.1 |
| m'-PyC  | -0.4      | -0.9 | -1.3 | -0.4      | 0.3  | -0.1 |
| p-PyC   | -0.2      | 0.5  | 0.3  | 0.2       | 0.6  | 0.8  |
| m''-PyC | 0.9       | 1.1  | 2.0  | 0.8       | 1.1  | 1.9  |
| o''-PyC | 1.6       | 3.5  | 5.1  | 2.6       | 2.9  | 5.5  |
| *C=N    | -1.1      | 8.1  | 7.0  | 2.2       | 2.3  | 4.5  |
| *CH3    | 0.6       | 1.9  | 2.5  | 0.6       | 0.5  | 1.1  |
| o-PhH   | 0.0       | 0.0  | 0.0  | -0.8      | -0.9 | -1.7 |
| m-PhH   | 0.0       | 0.0  | 0.0  | -0.3      | -0.4 | -0.7 |
| p-PhH   | 0.0       | 0.0  | 0.0  | -0.3      | -0.3 | -0.6 |
| o'-PyH  | -0.1      | -0.4 | -0.5 | -2.9      | -1.5 | -4.4 |
| m'-PyH  | 0.0       | 0.0  | 0.0  | -0.4      | 0.0  | -0.4 |
| p-PyH   | 0.0       | 0.2  | 0.2  | 0.1       | 0.2  | 0.3  |
| m''-PyH | 0.0       | 0.6  | 0.6  | 0.6       | 0.5  | 1.1  |
| CH3*    | 0.0       | 0.2  | 0.2  | 0.3       | 0.0  | 0.3  |

Table S7: Experimental and calculated chemical shifts (in ppm) in the  $[\text{Ni}(\text{AcPyOx})_3(\text{BPh})]^+$  complex according to the VV, mPV and BB approaches. The orbital (Orb) contributions (in ppm) to the calculated shifts were evaluated from the ZORA-PBE0 method and the paramagnetic contributions (Para) (in ppm) were evaluated according to eq. 1 where the  $A_K$  tensors are from the ZORA-PBE0 method while the  $\chi^s$  tensors were evaluated according to the three approaches from SO-CASPT2 results.

|         | Exp    | Cal   |       |       | Orb   | Para   |        |        |
|---------|--------|-------|-------|-------|-------|--------|--------|--------|
|         |        | VV    | mPV   | BB    |       | VV     | mPV    | BB     |
| o-PhC   | 147.7  | 149.0 | 148.9 | 149.1 | 139.7 | 9.3    | 9.2    | 9.4    |
| m-PhC   | 130    | 138.4 | 138.4 | 138.4 | 136.3 | 2.1    | 2.1    | 2.1    |
| p-PhC   | 128    | 136.9 | 136.9 | 136.9 | 138.0 | -1.1   | -1.1   | -1.1   |
| i-PhC   | 78.4   | 86.2  | 86.5  | 85.9  | 147.0 | -60.8  | -60.5  | -61.1  |
| o'-PyC  | -9.6   | -47.6 | -46.7 | -48.7 | 156.5 | -204.1 | -203.2 | -205.2 |
| m'-PyC  | 544.2  | 594.1 | 592.1 | 596.6 | 132.4 | 461.7  | 459.7  | 464.2  |
| p-PyC   | 116.3  | 130.0 | 130.1 | 129.9 | 150.9 | -20.9  | -20.8  | -21.0  |
| m''-PyC | 393.1  | 418.7 | 417.5 | 420.3 | 132.0 | 286.7  | 285.5  | 288.3  |
| o''-PyC | -116.9 | -71.7 | -70.7 | -73.0 | 164.7 | -236.4 | -235.4 | -237.7 |
| *C=N    | 54     | 53.8  | 54.2  | 53.2  | 163.0 | -109.2 | -108.8 | -109.8 |
| *CH3    | 322    | 396.2 | 394.5 | 398.3 | 12.0  | 384.2  | 382.5  | 386.3  |
| o-PhH   | 7.4    | 8.2   | 8.2   | 8.2   | 7.9   | 0.3    | 0.3    | 0.3    |
| m-PhH   | 6.6    | 7.0   | 7.0   | 7.0   | 7.7   | -0.7   | -0.7   | -0.7   |
| p-PhH   | 6.9    | 7.6   | 7.6   | 7.6   | 7.7   | -0.1   | -0.1   | -0.1   |
| o'-PyH  | 137.3  | 155.8 | 155.1 | 156.6 | 7.9   | 147.9  | 147.2  | 148.7  |
| m'-PyH  | 44.1   | 45.0  | 44.8  | 45.2  | 7.6   | 37.4   | 37.2   | 37.6   |
| p-PyH   | 15.5   | 17.3  | 17.2  | 17.3  | 8.4   | 8.9    | 8.8    | 8.9    |
| m''-PyH | 59.9   | 58.6  | 58.4  | 58.9  | 8.2   | 50.4   | 50.2   | 50.7   |
| CH3*    | -24    | -42.0 | -41.8 | -42.2 | 2.6   | -44.6  | -44.4  | -44.8  |



Table S8: Calculated orbital chemical shifts (in ppm) in the  $[\text{Mn}(\text{AcPyOx})_3(\text{BPh})]^+$  complex with the different DFT functionals. The experimental chemical shifts in the diamagnetic  $[\text{Fe}(\text{AcPyOx})_3(\text{BPh})]^+$  complex are given for comparison.

|         | PBE   | PBE0  | M06   | M06-2X | CAM-B3LYP | B2PLYP | Exp   |
|---------|-------|-------|-------|--------|-----------|--------|-------|
| o-PhC   | 138.8 | 140.6 | 147.0 | 159.0  | 142.1     | 141.5  | 131.7 |
| m-PhC   | 135.1 | 136.5 | 143.1 | 154.5  | 138.6     | 137.7  | 127.4 |
| p-PhC   | 136.7 | 138.0 | 144.1 | 155.6  | 139.7     | 138.6  | 128.0 |
| i-PhC   | 145.4 | 147.9 | 155.2 | 170.4  | 152.0     | 151.3  | -     |
| o'-PyC  | 151.2 | 155.0 | 164.8 | 173.2  | 158.0     | 158.4  | 153.0 |
| m'-PyC  | 132.0 | 132.9 | 139.4 | 150.5  | 134.5     | 132.8  | 125.8 |
| p-PyC   | 147.9 | 151.8 | 160.0 | 172.4  | 154.9     | 155.0  | 137.9 |
| m''-PyC | 129.5 | 131.3 | 137.2 | 147.8  | 133.1     | 131.9  | 124.5 |
| o''-PyC | 159.9 | 163.1 | 171.6 | 182.3  | 167.6     | 167.4  | 158.0 |
| *C=N    | 157.4 | 160.8 | 171.2 | 180.1  | 163.5     | 164.8  | 160.6 |
| *CH3    | 10.4  | 10.6  | 11.4  | 10.4   | 9.7       | 11.5   | 13.2  |
| o-PhH   | 8.2   | 8.2   | 8.4   | 9.2    | 8.1       | 7.9    | 7.8   |
| m-PhH   | 8.1   | 8.0   | 8.1   | 9.1    | 7.8       | 7.6    | 7.4   |
| p-PhH   | 8.0   | 8.0   | 8.1   | 9.1    | 7.8       | 7.6    | 7.4   |
| o'-PyH  | 8.8   | 8.9   | 9.0   | 9.9    | 8.9       | 8.7    | 7.1   |
| m'-PyH  | 7.6   | 7.7   | 7.8   | 8.7    | 7.8       | 7.6    | 7.5   |
| p-PyH   | 8.2   | 8.3   | 8.4   | 9.3    | 8.5       | 8.3    | 8.1   |
| m''-PyH | 7.8   | 7.9   | 8.0   | 8.9    | 8.0       | 7.8    | 7.9   |
| CH3*    | 2.5   | 2.5   | 2.5   | 2.7    | 2.6       | 2.4    | 2.7   |

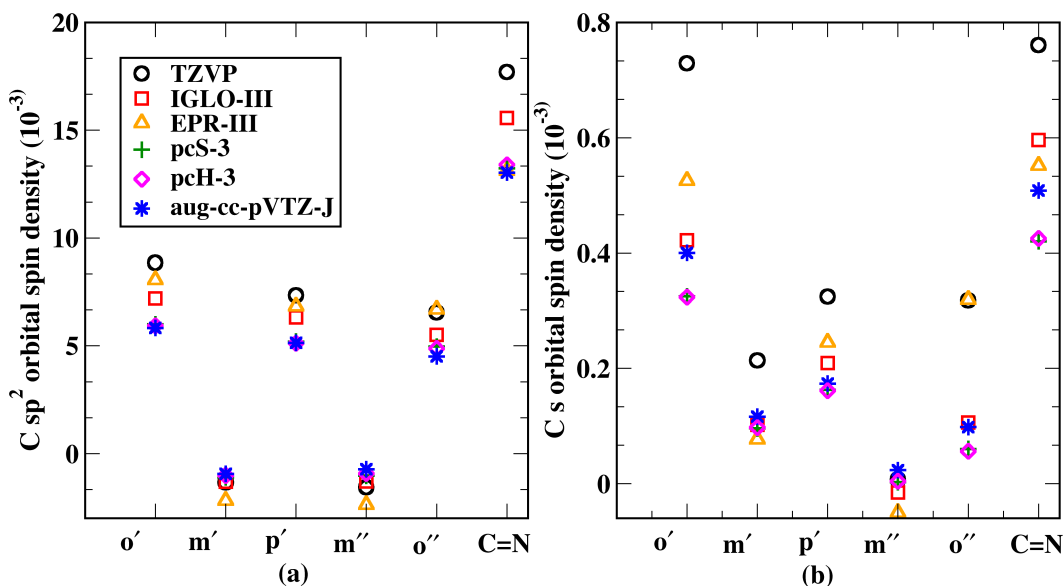

Figure S1: Löwdin ligand-atomic  $sp^2$  hybrid orbital spin populations and their components in the  $s$  orbitals deduced for the C atoms for the different basis sets for the  $[\text{Mn}(\text{AcPyOx})_3(\text{BPh})]^+$  complex.

Table S9: Calculated orbital chemical shifts (in ppm) in the  $[\text{Ni}(\text{AcPyOx})_3(\text{BPh})]^+$  complex with the different DFT functionals. The experimental chemical shifts in the diamagnetic  $[\text{Fe}(\text{AcPyOx})_3(\text{BPh})]^+$  complex are given for comparison.

|         | PBE   | PBE0  | M06   | M06-2X | CAM-B3LYP | B2PLYP | Exp   |
|---------|-------|-------|-------|--------|-----------|--------|-------|
| o-PhC   | 137.8 | 139.7 | 136.7 | 157.1  | 142.2     | 141.1  | 131.7 |
| m-PhC   | 135.1 | 136.3 | 134.2 | 153.9  | 138.9     | 137.5  | 127.4 |
| p-PhC   | 136.9 | 138.0 | 135.6 | 155.4  | 140.3     | 138.8  | 128.0 |
| i-PhC   | 144.7 | 147.0 | 144.3 | 167.8  | 151.6     | 150.5  | -     |
| o'-PyC  | 152.2 | 156.5 | 158.1 | 181.6  | 159.8     | 160.0  | 153.0 |
| m'-PyC  | 131.3 | 132.4 | 130.4 | 149.7  | 134.9     | 132.9  | 125.8 |
| p-PyC   | 146.2 | 150.9 | 149.6 | 172.2  | 154.8     | 154.9  | 137.9 |
| m''-PyC | 130.7 | 132.0 | 129.3 | 149.9  | 134.4     | 132.6  | 124.5 |
| o''-PyC | 161.6 | 164.7 | 163.6 | 187.5  | 169.1     | 168.4  | 158.0 |
| *C=N    | 158.0 | 163.0 | 165.9 | 189.3  | 166.3     | 167.5  | 160.6 |
| *CH3    | 12.4  | 12.0  | 10.9  | 13.8   | 11.3      | 12.5   | 13.2  |
| o-PhH   | 7.9   | 7.9   | 7.9   | 8.3    | 7.8       | 7.6    | 7.8   |
| m-PhH   | 7.7   | 7.7   | 7.7   | 8.5    | 7.7       | 7.4    | 7.4   |
| p-PhH   | 7.8   | 7.7   | 7.7   | 8.7    | 7.7       | 7.5    | 7.4   |
| o'-PyH  | 8.0   | 7.9   | 7.3   | 7.0    | 7.9       | 7.7    | 7.1   |
| m'-PyH  | 7.6   | 7.6   | 7.5   | 8.4    | 7.6       | 7.4    | 7.5   |
| p-PyH   | 8.3   | 8.4   | 8.3   | 9.6    | 8.5       | 8.4    | 8.1   |
| m''-PyH | 8.1   | 8.2   | 8.2   | 9.8    | 8.2       | 8.0    | 7.9   |
| CH3*    | 2.6   | 2.6   | 2.5   | 3.1    | 2.6       | 2.5    | 2.7   |

Table S10: Calculated paramagnetic chemical shifts (in ppm) in the  $[\text{Mn}(\text{AcPyOx})_3(\text{BPh})]^+$  complex according to VV approach where the hyperfine tensors were calculated with the different DFT functionals. The experimental paramagnetic chemical shifts are taken from Table S5.

|         | PBE    | PBE0   | M06    | M06-2X | CAM-B3LYP | B2PLYP | Exp   |
|---------|--------|--------|--------|--------|-----------|--------|-------|
| o-PhC   | -2.8   | -2.2   | -3.0   | 2.9    | 0.4       | -2.0   | 13.7  |
| m-PhC   | 5.3    | 4.3    | 1.7    | 2.8    | 3.3       | 5.5    | 3.9   |
| p-PhC   | -4.1   | -4.0   | -2.7   | -2.5   | -2.6      | -5.1   | -0.1  |
| i-PhC   | -30.1  | -22.1  | -49.5  | -29.5  | -18.9     | -9.3   | -     |
| o'-PyC  | 1006.8 | 793.2  | 917.5  | 782.6  | 751.8     | 621.9  | -     |
| m'-PyC  | 618.7  | 388.6  | 482.1  | 367.2  | 413.8     | 253.5  | 510.1 |
| p-PyC   | 279.4  | 231.5  | 124.8  | 244.0  | 182.8     | 222.7  | 253.7 |
| m''-PyC | 104.4  | 22.0   | 99.4   | 90.6   | 94.5      | 5.2    | 63.7  |
| o''-PyC | -98.5  | -189.6 | -188.6 | 24.2   | -176.6    | -291.4 | -     |
| *C=N    | 405.0  | 344.4  | 400.9  | 815.7  | 463.6     | 611.6  | 646.4 |
| *CH3    | 58.8   | 5.5    | 14.8   | 98.6   | 38.8      | -76.0  | -1.5  |
| o-PhH   | 2.2    | 1.0    | 0.5    | 0.3    | 1.1       | 0.9    | 0.7   |
| m-PhH   | -0.5   | -0.5   | -0.7   | -0.2   | -0.4      | -0.6   | -0.1  |
| p-PhH   | 1.5    | 0.8    | 1.2    | 0.4    | 0.6       | 0.8    | 0.1   |
| o'-PyH  | 170.3  | 106.7  | 165.4  | 39.9   | 119.8     | 77.4   | 96.9  |
| m'-PyH  | 56.3   | 42.5   | 37.5   | 28.0   | 41.3      | 38.5   | 39.5  |
| p-PyH   | -56.1  | -43.2  | -61.2  | -29.7  | -36.3     | -40.0  | -34.0 |
| m''-PyH | 69.6   | 49.3   | 47.3   | 38.3   | 49.2      | 41.1   | 39.1  |
| CH3*    | 171.2  | 121.3  | 118.4  | 81.2   | 118.4     | 113.8  | -     |

Table S11: Calculated paramagnetic chemical shifts (in ppm) in the  $[\text{Ni}(\text{AcPyOx})_3(\text{BPh})]^+$  complex according to VV approach where the hyperfine tensors were calculated with the different DFT functionals. The experimental paramagnetic chemical shifts are taken from Table S5.

|         | PBE    | PBE0   | M06    | M06-2X | CAM-B3LYP | B2PLYP | Exp    |
|---------|--------|--------|--------|--------|-----------|--------|--------|
| o-PhC   | 16.4   | 9.3    | 12.3   | 7.1    | 10.2      | 7.9    | 16.0   |
| m-PhC   | 4.0    | 2.1    | 3.2    | 3.7    | 1.9       | 1.4    | 2.6    |
| p-PhC   | -0.7   | -1.1   | -1.2   | -1.1   | -0.7      | -0.8   | 0.0    |
| i-PhC   | -82.2  | -60.8  | -77.8  | -47.1  | -57.5     | -52.9  | -      |
| o'-PyC  | -98.4  | -204.1 | -352.1 | -184.3 | -179.9    | -260.7 | -162.6 |
| m'-PyC  | 687.4  | 461.7  | 493.5  | 363.9  | 437.5     | 287.6  | 418.4  |
| p-PyC   | -17.7  | -20.9  | 3.8    | -54.0  | -14.6     | -3.4   | -21.6  |
| m''-PyC | 434.3  | 286.7  | 334.7  | 251.0  | 272.3     | 153.9  | 268.6  |
| o''-PyC | -249.6 | -236.4 | -326.8 | -114.6 | -209.2    | -90.6  | -274.9 |
| *C=N    | 372.1  | -109.2 | -82.2  | -142.8 | -122.6    | -708.8 | -106.6 |
| *CH3    | 447.7  | 384.2  | 391.1  | 329.2  | 370.9     | 399.7  | 308.8  |
| o-PhH   | 3.7    | 0.3    | 1.0    | -1.6   | 0.5       | -0.5   | -0.4   |
| m-PhH   | -0.8   | -0.7   | -0.5   | 0.7    | -0.6      | -0.6   | -0.8   |
| p-PhH   | 0.2    | -0.1   | 0.0    | -0.2   | -0.2      | -0.2   | -0.5   |
| o'-PyH  | 244.5  | 147.9  | 201.9  | 115.3  | 143.3     | 97.5   | 130.2  |
| m'-PyH  | 66.6   | 37.4   | 37.1   | 24.1   | 32.6      | 28.2   | 36.6   |
| p-PyH   | 17.3   | 8.9    | 20.7   | 6.2    | 7.3       | 6.2    | 7.4    |
| m''-PyH | 85.8   | 50.4   | 53.1   | 36.8   | 46.0      | 39.3   | 52.0   |
| CH3*    | -36.2  | -44.6  | -52.3  | -29.0  | -49.8     | -79.0  | -26.7  |

Table S12: Mean absolute residuals (MAR) (in ppm) of the calculated  $^{13}\text{C}$  and  $^1\text{H}$  chemical shifts in the Mn and Ni  $[\text{M}(\text{AcPyOx})_3(\text{BPh})]^+$  complexes for the different DFT functionals and the basis sets with respect to experimental chemical shifts reported in Table S5. The MAR of the calculated diamagnetic (Dia) and paramagnetic (Para) chemical shifts for each method are reported separately.

|               |                 |              | Dia             |              | Para            |              |
|---------------|-----------------|--------------|-----------------|--------------|-----------------|--------------|
|               | $^{13}\text{C}$ | $^1\text{H}$ | $^{13}\text{C}$ | $^1\text{H}$ | $^{13}\text{C}$ | $^1\text{H}$ |
| PBE           | 91              | 24           | 5.2             | 0.4          | 91              | 23           |
| PBE0          | 40              | 5            | 6.7             | 0.4          | 41              | 5            |
| M06           | 53              | 15           | 9.6             | 0.4          | 55              | 15           |
| M06-2X        | 49              | 8            | 24.1            | 1.2          | 45              | 8            |
| CAM-B3LYP     | 36              | 6            | 9.2             | 0.4          | 35              | 6            |
| B2PLYP        | 91              | 9            | 8.5             | 0.3          | 96              | 9            |
| TZVP          | 44              | 5            | 3.9             | 0.4          | 47              | 5            |
| EPR-III       | 67              | 10           | 9.1             | 1.3          | 66              | 9            |
| aug-cc-pVTZ-J | 40              | 8            | 5.9             | 0.6          | 41              | 7            |
| pcS-3         | 47              | 11           | 6.8             | 0.5          | 48              | 7            |
| pcH-3         | 40              | 12           | 8.0             | 0.5          | 41              | 8            |

Table S13: Diamagnetic contribution (in ppm) to the orbital chemical shifts in the  $[\text{Ni}(\text{AcPyOx})_3(\text{BPh})]^+$  complex with the different DFT functionals. Absolute values are given.

|         | PBE   | PBE0  | M06   | M06-2X | CAM-B3LYP | B2PLYP |
|---------|-------|-------|-------|--------|-----------|--------|
| o-PhC   | 262.0 | 260.5 | 265.6 | 257.2  | 259.1     | 258.9  |
| m-PhC   | 250.2 | 249.3 | 264.6 | 251.5  | 247.7     | 247.4  |
| p-PhC   | 239.6 | 239.6 | 261.4 | 245.6  | 238.3     | 237.9  |
| i-PhC   | 256.5 | 255.7 | 250.3 | 248.0  | 251.9     | 251.5  |
| o'-PyC  | 263.1 | 262.0 | 269.0 | 260.2  | 260.8     | 260.7  |
| m'-PyC  | 256.4 | 255.8 | 270.8 | 255.7  | 254.2     | 254.3  |
| p-PyC   | 252.1 | 252.4 | 270.9 | 256.3  | 251.3     | 251.4  |
| m''-PyC | 262.9 | 261.8 | 276.2 | 261.9  | 260.4     | 259.8  |
| o''-PyC | 260.3 | 259.0 | 258.8 | 255.7  | 257.7     | 257.8  |
| *C=N    | 259.3 | 259.0 | 261.2 | 261.3  | 258.5     | 258.5  |
| *CH3    | 255.4 | 254.6 | 274.9 | 250.8  | 252.5     | 252.5  |
| o-PhH   | 38.3  | 38.1  | 40.2  | 37.2   | 38.0      | 38.3   |
| m-PhH   | 24.6  | 24.9  | 24.1  | 26.3   | 25.1      | 25.2   |
| p-PhH   | 17.4  | 18.2  | 16.1  | 20.9   | 18.6      | 18.8   |
| o'-PyH  | 42.5  | 41.9  | 43.7  | 40.2   | 41.3      | 41.5   |
| m'-PyH  | 31.0  | 30.9  | 30.0  | 30.9   | 30.8      | 30.8   |
| p-PyH   | 26.3  | 26.5  | 24.7  | 27.3   | 26.6      | 26.7   |
| m''-PyH | 31.6  | 31.7  | 32.5  | 32.1   | 31.9      | 32.1   |
| CH3*    | 32.4  | 32.4  | 34.4  | 32.5   | 32.2      | 32.6   |

Table S14: Paramagnetic contribution (in ppm) to the orbital chemical shifts in the  $[\text{Ni}(\text{AcPyOx})_3(\text{BPh})]^+$  complex with the different DFT functionals. Absolute values are given.

|         | PBE    | PBE0   | M06    | M06-2X | CAM-B3LYP | B2PLYP |
|---------|--------|--------|--------|--------|-----------|--------|
| o-PhC   | -218.9 | -214.7 | -235.1 | -235.7 | -217.6    | -213.2 |
| m-PhC   | -204.3 | -200.1 | -230.9 | -226.8 | -202.9    | -198.1 |
| p-PhC   | -195.5 | -192.2 | -229.0 | -222.4 | -194.9    | -189.9 |
| i-PhC   | -220.3 | -217.1 | -227.5 | -237.2 | -219.8    | -215.2 |
| o'-PyC  | -234.3 | -233.1 | -261.5 | -263.2 | -236.8    | -233.9 |
| m'-PyC  | -206.8 | -202.7 | -233.0 | -226.8 | -205.5    | -200.4 |
| p-PyC   | -217.4 | -217.8 | -253.2 | -249.9 | -222.4    | -219.5 |
| m''-PyC | -212.7 | -208.4 | -238.2 | -233.2 | -211.1    | -205.6 |
| o''-PyC | -241.0 | -238.2 | -256.6 | -264.5 | -243.1    | -239.3 |
| *C=N    | -236.4 | -236.5 | -261.0 | -272.0 | -241.0    | -239.2 |
| *CH3    | -86.9  | -81.1  | -111.9 | -85.9  | -80.1     | -78.1  |
| o-PhH   | -14.6  | -14.4  | -16.2  | -13.7  | -14.1     | -14.2  |
| m-PhH   | -0.7   | -1.0   | 0.0    | -3.0   | -1.0      | -0.9   |
| p-PhH   | 6.5    | 5.7    | 8.0    | 2.3    | 5.4       | 5.4    |
| o'-PyH  | -18.9  | -18.3  | -19.6  | -15.4  | -17.5     | -17.5  |
| m'-PyH  | -6.9   | -6.9   | -5.9   | -7.5   | -6.8      | -6.6   |
| p-PyH   | -3.0   | -3.3   | -1.4   | -5.1   | -3.3      | -3.4   |
| m''-PyH | -8.1   | -8.3   | -9.0   | -10.0  | -8.4      | -8.4   |
| CH3*    | -3.5   | -3.4   | -5.2   | -3.8   | -3.2      | -3.4   |

Table S15: Calculated and experimental NMR chemical shifts (in ppm) in the  $[\text{Co}(\text{AcPyOx})_3(\text{BPh})]^+$  complex. The orbital (Orb) and paramagnetic (Para) dipolar (Dip) and contact (Con) contributions (in ppm) to the calculated NMR chemical shifts are highlighted. The diamagnetic and contact contributions (in ppm) were calculated at unrestricted DFT ZORA-PBE0/IGLO-III level of theory. The dipolar contributions were calculated considering the semi-classical point-dipolar (PD) equation (eq. S4) or based on the two QC methods, namely the unrestricted DFT ZORA-PBE0 (PBE0) and SO-CASSCF (CAS) based hyperfine tensors according to VV approach.

|         | Orb   |        |       | Para   |        |        | Cal =       |        |        | Exp |
|---------|-------|--------|-------|--------|--------|--------|-------------|--------|--------|-----|
|         | Dip   |        |       | Con    |        |        | Orb+Dip+Con |        |        |     |
|         | PD    | PBE0   | CAS   | PD     | PBE0   | CAS    | PD          | PBE0   | CAS    |     |
| o-PhC   | 140.7 | 94.0   | 54.4  | 98.2   | 7.1    | 241.8  | 202.2       | 246.0  | 208.6  |     |
| m-PhC   | 136.5 | 50.0   | 27.2  | 52.4   | 4.4    | 190.9  | 168.1       | 193.3  | 164.7  |     |
| p-PhC   | 138.0 | 40.9   | 24.3  | 42.9   | -1.8   | 177.1  | 160.5       | 179.1  | 155.4  |     |
| i-PhC   | 148.9 | 166.0  | 89.1  | 172.5  | -74.2  | 240.7  | 163.8       | 247.2  | 263.9  |     |
| o'-PyC  | 159.7 | 200.7  | 197.9 | 228.8  | -175.4 | 185.0  | 182.2       | 213.1  | 554.9  |     |
| m'-PyC  | 131.1 | 42.0   | 9.4   | 44.9   | 526.6  | 699.7  | 667.1       | 702.6  | 146.7  |     |
| p-PyC   | 150.9 | -20.3  | 4.0   | -20.2  | 2.7    | 133.3  | 157.6       | 133.4  | 318.3  |     |
| m''-PyC | 131.4 | -86.6  | -58.2 | -89.4  | 271.7  | 316.5  | 344.9       | 313.7  | -476.5 |     |
| o''-PyC | 163.6 | -302.0 | -76.0 | -314.0 | -617.5 | -755.9 | -529.9      | -767.9 | 97.7   |     |
| *C=N    | 162.3 | -235.2 | -79.9 | -248.1 | -73.8  | -146.7 | 8.6         | -159.6 | 189.4  |     |
| *CH3    | 10.8  | -50.7  | -26.2 | -52.3  | 256.3  | 216.4  | 240.9       | 214.8  | 67.9   |     |
| o-PhH   | 9.1   | 86.4   | 50.9  | 90.5   | 1.3    | 96.8   | 61.3        | 100.9  | 29.9   |     |
| m-PhH   | 8.2   | 34.2   | 19.7  | 35.8   | -0.1   | 42.3   | 27.8        | 43.9   | 25.7   |     |
| p-PhH   | 8.4   | 27.3   | 15.8  | 28.6   | 0.6    | 36.3   | 24.8        | 37.6   | 396.2  |     |
| o'-PyH  | 12.1  | 362.4  | 194.3 | 377.7  | 172.7  | 547.2  | 379.1       | 562.5  | 80.1   |     |
| m'-PyH  | 8.2   | 46.3   | 28.4  | 49.8   | 41.1   | 95.6   | 77.7        | 99.1   | 15.1   |     |
| p-PyH   | 8.3   | -12.0  | -5.0  | -12.6  | -1.8   | -5.5   | 1.5         | -6.1   | -12.0  |     |
| m''-PyH | 7.5   | -63.3  | -33.9 | -66.6  | 47.1   | -8.7   | 20.7        | -12.0  | 2.4    |     |
| CH3*    | 2.3   | -29.0  | -17.3 | -30.5  | 17.1   | -9.6   | 2.1         | -11.1  |        |     |

Table S16: Calculated NMR chemical shifts (in ppm) in the  $[\text{Co}(\text{AcPyOx})_3(\text{BPh})]^+$  complex according to the mPV and BB approaches. The orbital (Orb) and paramagnetic dipolar (Dip) and contact (Con) contributions (in ppm) to calculated NMR chemical shifts are reported. Unrestricted DFT ZORA-PBE0/IGLO-III based hyperfine tensors were used to calculate the paramagnetic chemical shifts.

|       | Orb   | Para  |        |       |        | Cal =       |        | Exp    |
|-------|-------|-------|--------|-------|--------|-------------|--------|--------|
|       |       | mPV   |        | BB    |        | Orb+Dip+Con |        |        |
|       |       | Dip   | Con    | Dip   | Con    | mPV         | BB     |        |
| o-PhC | 140.7 | 62.8  | 6.8    | 60.2  | 7.4    | 210.3       | 208.3  | 208.6  |
| m-PhC | 136.5 | 31.4  | 4.4    | 30.1  | 4.7    | 172.3       | 171.3  | 164.7  |
| p-PhC | 138.0 | 28.0  | -1.8   | 26.8  | -1.9   | 164.2       | 162.9  | 155.4  |
| i-PhC | 148.9 | 102.7 | -70.0  | 98.5  | -77.0  | 181.6       | 170.4  |        |
| 6-PyC | 159.7 | 226.6 | -171.3 | 218.7 | -184.1 | 215.0       | 194.3  | 263.9  |
| 5-PyC | 131.1 | 12.7  | 501.4  | 11.1  | 548.0  | 645.2       | 690.2  | 554.9  |
| 4-PyC | 150.9 | 4.4   | 0.8    | 4.9   | 2.0    | 156.1       | 157.8  | 146.7  |
| 3-PyC | 131.4 | -68.0 | 260.0  | -64.7 | 283.3  | 323.4       | 350.0  | 318.3  |
| 2-PyC | 163.6 | -89.1 | -594.6 | -84.4 | -645.1 | -520.1      | -565.9 | -476.5 |
| C=N   | 162.3 | -94.7 | -68.8  | -88.2 | -76.6  | -1.2        | -2.5   | 97.7   |
| *CH3  | 10.8  | -30.6 | 243.3  | -29.1 | 266.5  | 223.5       | 248.2  | 189.4  |
| o-PhH | 9.1   | 58.7  | 1.3    | 56.3  | 1.4    | 69.1        | 66.8   | 67.9   |
| m-PhH | 8.2   | 22.7  | -0.1   | 21.8  | -0.1   | 30.8        | 29.9   | 29.9   |
| p-PhH | 8.4   | 18.2  | 0.5    | 17.5  | 0.6    | 27.1        | 26.5   | 25.7   |
| 6-PyH | 12.1  | 224.0 | 166.1  | 214.7 | 180.3  | 402.2       | 407.1  | 396.2  |
| 5-PyH | 8.2   | 32.9  | 38.9   | 31.4  | 42.7   | 80.0        | 82.3   | 80.1   |
| 4-PyH | 8.3   | -5.7  | -2.0   | -5.5  | -1.9   | 0.6         | 0.9    | 15.1   |
| 3-PyH | 7.5   | -39.1 | 44.5   | -37.5 | 49.0   | 12.9        | 19.0   | -2.5   |
| CH3*  | 2.3   | -20.0 | 16.3   | -19.2 | 17.8   | -1.4        | 0.9    | 2.4    |

Table S17: The three principal  $g$ -values and the  $\langle \mathbf{S} \cdot \mathbf{S} \rangle$  ( $\times \mu_0 \mu_B^2 N_A$ ) tensor components (in  $10^{-8} \text{ m}^3 \text{ mol}^{-1}$ ) (at 298 K) of the 2 KDs (modeled with  $\tilde{S} = 3/2$ ) and 3 KDs (modeled with  $\tilde{S} = 5/2$ ).

|       | $\tilde{S}$ | $g_1, g_2, g_3$  | $\langle \mathbf{S} \cdot \mathbf{S} \rangle$ |
|-------|-------------|------------------|-----------------------------------------------|
| 2 KDs | 3/2         | 1.72, 1.76, 3.25 | 1.07, 1.10, 2.69                              |
| 3 KDs | 5/2         | 1.40, 1.40, 1.75 | 1.41, 1.43, 2.55                              |



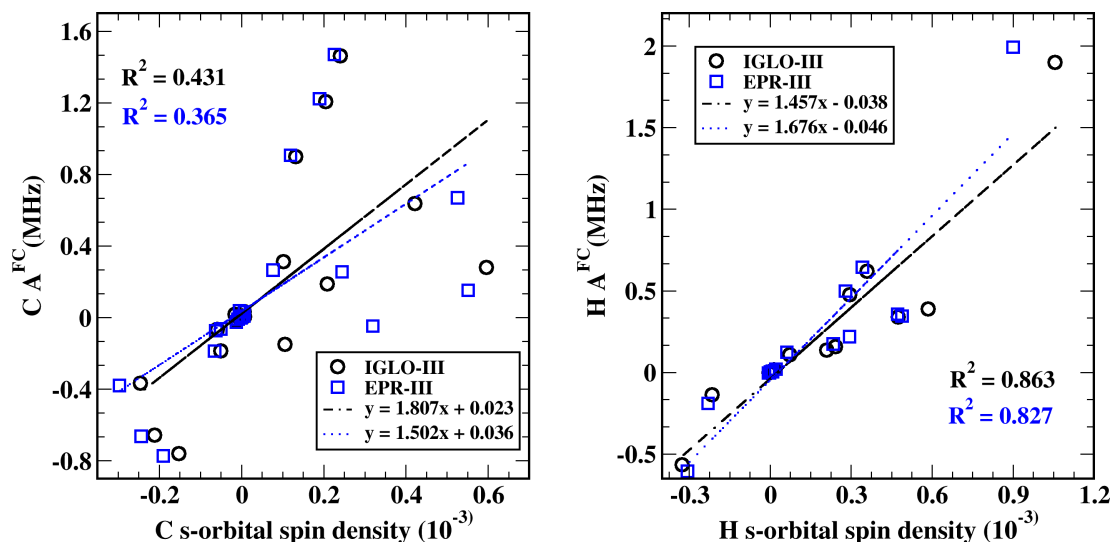

Figure S2: Correlation plots of the Fermi-contact Hyperfine coupling constants  $A^{FC}$  vs the s-orbitals' spin populations  $\rho_s^s$  for the ligand C and H atoms calculated at unrestricted DFT ZORA-PBE0 level of theory. The slopes ( $\times 10^3$ ) can be compared to the hyperfine coupling constant  $G$  (in MHz) with an unpaired electron in the atomic valence s-orbital (ns): for H 1s orbital, experimental  $G = 1420$  MHz and for C 2s orbital, theoretical  $G = 3760$  MHz from Ref. <sup>10</sup>, 5520 MHz from ZORA-PBE0/EPR-III and 5516 MHz from ZORA-PBE0/IGLO-III.

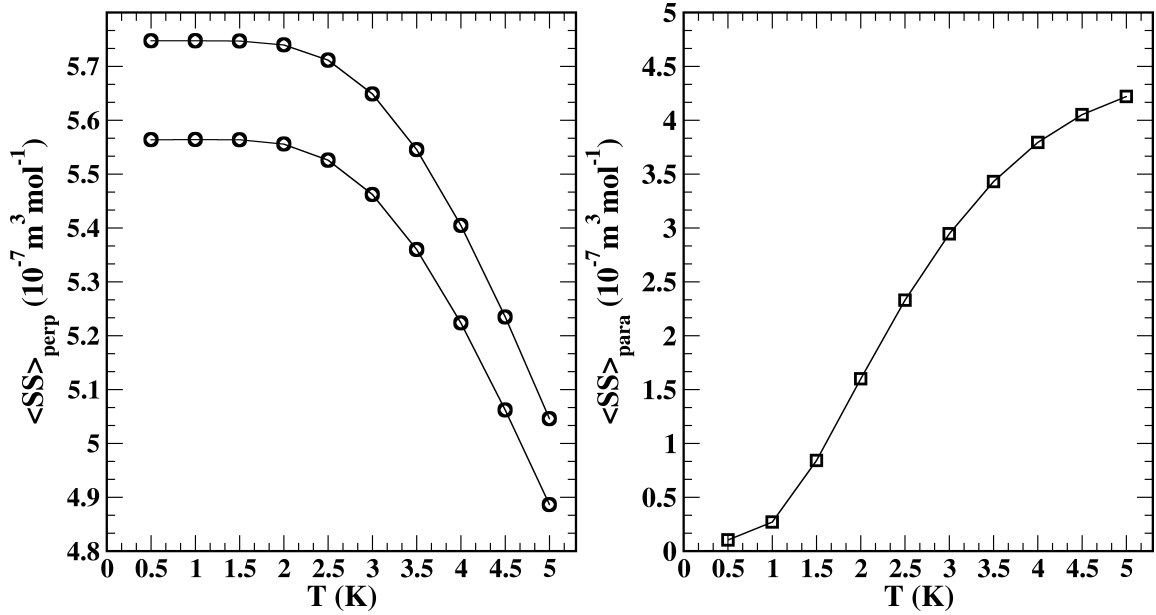

Figure S3: Temperature dependence of the perpendicular (perp) and parallel (para) components of the diagonal  $\langle \mathbf{S} \cdot \mathbf{S} \rangle$  ( $\times \mu_0 \mu_B^2 N_A$ ) tensor in the  $[\text{Ni}(\text{AcPyOx})_3(\text{BPh})]^+$  complex evaluated according to eq. 11 in the three lowest energy states and by neglecting the orbital Zeeman contribution to the energy Hamiltonian matrix of  $\hat{H}(\hat{m}_i; B_0)$  operator. The calculated very-low temperature behavior of the perpendicular and parallel components directly from the SO-CASPT2 space are in accordance with the reported behavior by Soncini and Van den Heuvel for a triplet model space ( $\tilde{S} = 1$ ) with  $D > 0$  ( $D=7.5 \text{ cm}^{-1}$ ) in Ref. <sup>11</sup> (ZFS parts of eq. 8).

## References

- (1) Kutzelnigg, W. Origin and meaning of the Fermi contact interaction. *Theor. Chim. Acta* **1988**, *73*, 173–200.
- (2) van Lenthe, E.; Van Der Avoird, A.; Wormer, P. E. Density functional calculations of molecular hyperfine interactions in the zero order regular approximation for relativistic effects. *J. Chem. Phys.* **1998**, *108*, 4783–4796.
- (3) Sharkas, K.; Pritchard, B.; Autschbach, J. Effects from Spin–Orbit Coupling on Electron–Nucleus Hyperfine Coupling Calculated at the Restricted Active Space Level for Kramers Doublets. *J. Chem. Theory Comput.* **2015**, *11*, 538–549.
- (4) Autschbach, J.; Patchkovskii, S.; Pritchard, B. Calculation of hyperfine tensors and paramagnetic NMR shifts using the relativistic zeroth-order regular approximation and density functional theory. *J. Chem. Theory Comput.* **2011**, *7*, 2175–2188.
- (5) Malkin, I.; Malkina, O. L.; Malkin, V. G.; Kaupp, M. Scalar relativistic calculations of hyperfine coupling tensors using the Douglas–Kroll–Hess method. *Chem. Phys. Lett.* **2004**, *396*, 268–276.
- (6) Autschbach, J. Relativistic Effects on Electron–Nucleus Hyperfine Coupling Studied with an Exact 2-Component (X2C) Hamiltonian. *J. Chem. Theory Comput.* **2017**, *13*, 710–718.
- (7) Sandhoefer, B.; Kossmann, S.; Neese, F. Derivation and assessment of relativistic hyperfine-coupling tensors on the basis of orbital-optimized second-order Møller–Plesset perturbation theory and the second-order Douglas–Kroll–Hess transformation. *J. Chem. Phys.* **2013**, *138*, 104102.
- (8) Pavlov, A. A.; Nehr Korn, J.; Pankratova, Y. A.; Ozerov, M.; Mikhalyova, E. A.; Polezhaev, A. V.; Nelyubina, Y. V.; Novikov, V. V. Detailed electronic structure of

- a high-spin cobalt (II) complex determined from NMR and THz-EPR spectroscopy. *Phys. Chem. Chem. Phys.* **2019**, *21*, 8201–8204.
- (9) Pavlov, A. A.; Savkina, S. A.; Belov, A. S.; Nelyubina, Y. V.; Efimov, N. N.; Voloshin, Y. Z.; Novikov, V. V. Trigonal prismatic tris-pyridineoximate transition metal complexes: A cobalt (II) compound with high magnetic anisotropy. *Inorg. Chem.* **2017**, *56*, 6943–6951.
- (10) Hurd, C.; Coodin, P. Atomic parameters for the interpretation of ESR and diamagnetic susceptibility data. *J. Phys. Chem. Solids* **1967**, *28*, 523–525.
- (11) Soncini, A.; Van den Heuvel, W. Communication: Paramagnetic NMR chemical shift in a spin state subject to zero-field splitting. *J Chem Phys* **2013**, *138*, 021103.
